# Supplementary material
Source: PubMed Central journal article supplement (PMC8491321)

**Supplemental Tables:**

**Supplemental Table 1.** Results from the PHS/HPFS GWAS for SNPs in the 50 genes from the top 26 modules selected by dmGWAS.

| Gene     | SNP        | P-value |
|----------|------------|---------|
| ACACA    | rs1473626  | 0.00731 |
| AMPH     | rs10276544 | 0.00486 |
| ARHGAP10 | rs10519917 | 0.00014 |
| ARMCX2   | rs2213369  | 0.00123 |
| BRE      | rs1546029  | 0.00038 |
| CAP2     | rs4712300  | 0.00074 |
| CARS2    | rs450514   | 0.00955 |
| CHST11   | rs312141   | 0.00018 |
| CS       | rs3816804  | 0.00084 |
| DLGAP1   | rs342484   | 0.00011 |
| DOCK1    | rs1006217  | 0.00063 |
| E2F5     | rs4150893  | 0.00060 |
| ENAM     | rs2609426  | 0.00003 |
| FLI1     | rs611307   | 0.00112 |
| GBP3     | rs1409150  | 0.00043 |
| GLT8D2   | rs17035135 | 0.02041 |
| GRM7     | rs17047073 | 0.00562 |
| HTR1F    | rs7653582  | 0.01115 |
| IL18     | rs360729   | 0.00020 |
| LARGE    | rs4420793  | 0.01027 |
| MRPL1    | rs1910301  | 0.01853 |
| NTSR2    | rs4669767  | 0.06247 |
| NUAK1    | rs7133815  | 0.00137 |
| NUP93    | rs2399560  | 0.02295 |
| PALLD    | rs17650886 | 0.00040 |
| PAR3     | rs4934655  | 0.00724 |
| PAR3B    | rs7606468  | 0.00004 |
| PDZRN3   | rs9830956  | 0.00051 |
| PPM1H    | rs2839798  | 0.00668 |
| PTPRD    | rs159224   | 0.00024 |
| RAPGEF5  | rs13236317 | 0.00266 |
| RERE     | rs172531   | 0.00004 |
| RERE     | rs301801   | 0.00004 |
| RNF141   | rs1993819  | 0.00050 |
| RPL28    | rs12709950 | 0.00053 |

|         |            |         |
|---------|------------|---------|
| SCHIP1  | rs9855092  | 0.01065 |
| SLC17A4 | rs1937131  | 0.00521 |
| SLC17A4 | rs7754296  | 0.00521 |
| SMAD3   | rs11637581 | 0.00180 |
| SNCA    | rs1471484  | 0.00340 |
| SND1    | rs3808115  | 0.00089 |
| SORBS1  | rs17537576 | 0.00804 |
| SPOCK1  | rs6596370  | 0.00524 |
| SYNPO2  | rs11938552 | 0.00394 |
| TACC2   | rs7078373  | 0.00052 |
| THADA   | rs10445925 | 0.01135 |
| THBS2   | rs9371115  | 0.00650 |
| TLE4    | rs2047995  | 0.01060 |
| TP53I11 | rs12364175 | 0.00835 |
| TXNDC5  | rs197119   | 0.00025 |
| UBE2S   | rs12709950 | 0.00053 |
| ZNRF1   | rs1043509  | 0.00013 |

### Supplemental Figure 1A:

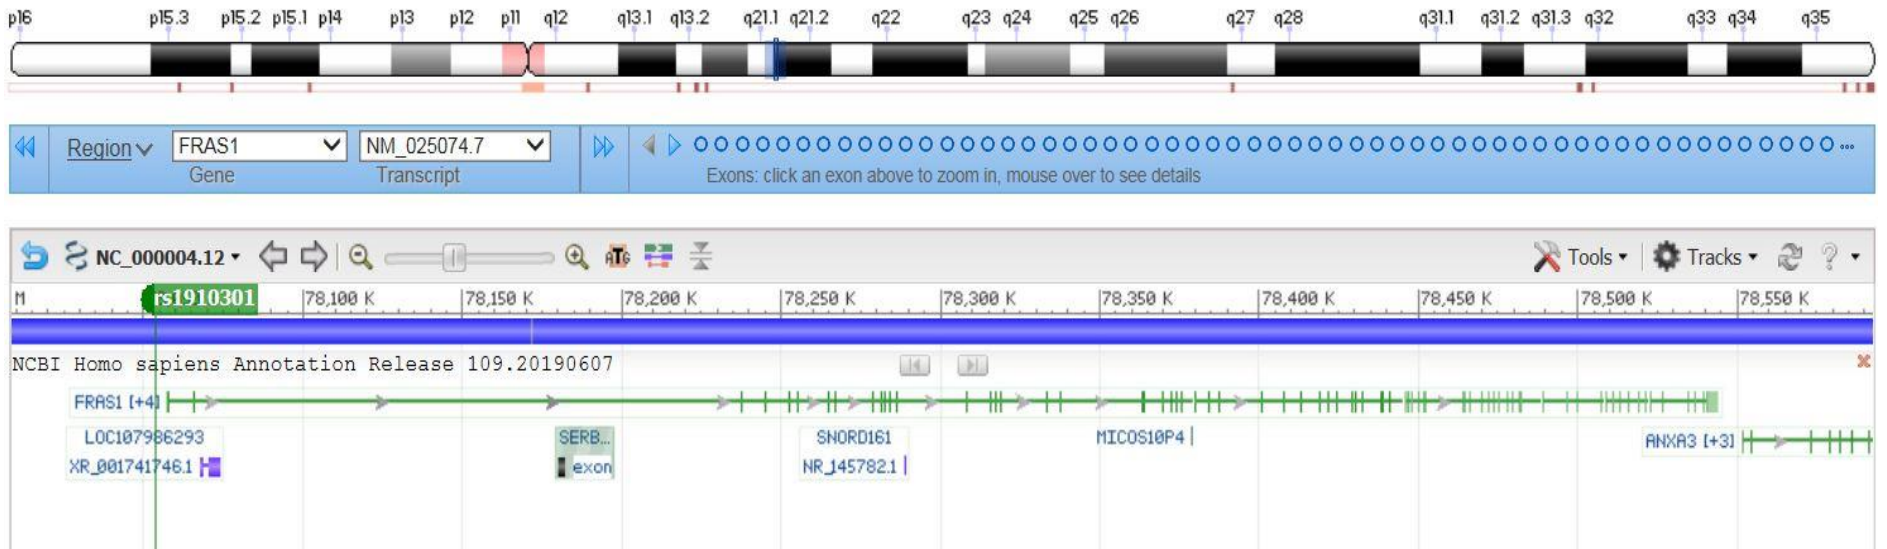

Screenshot from <https://www.ncbi.nlm.nih.gov/snp/rs1910301> from Jul 11, 2019

### Supplemental Figure 1B:

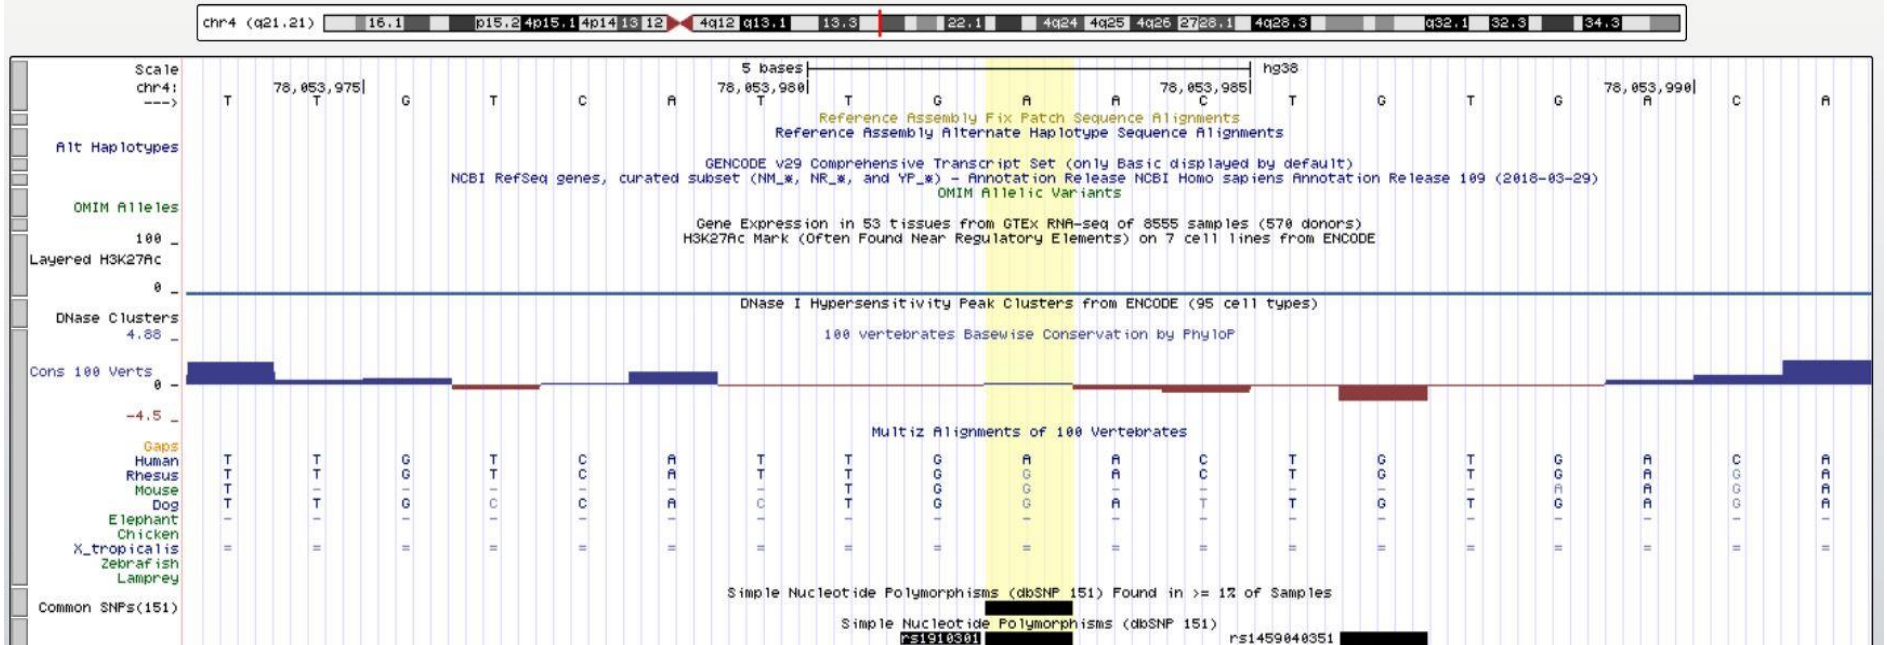

Screenshot from UCSC Genome Browser from Jul 11, 2019 [search: rs1910301, Human Assembly Dec, 2013, (GRCh38/hg38)].

Supplemental Figure 2

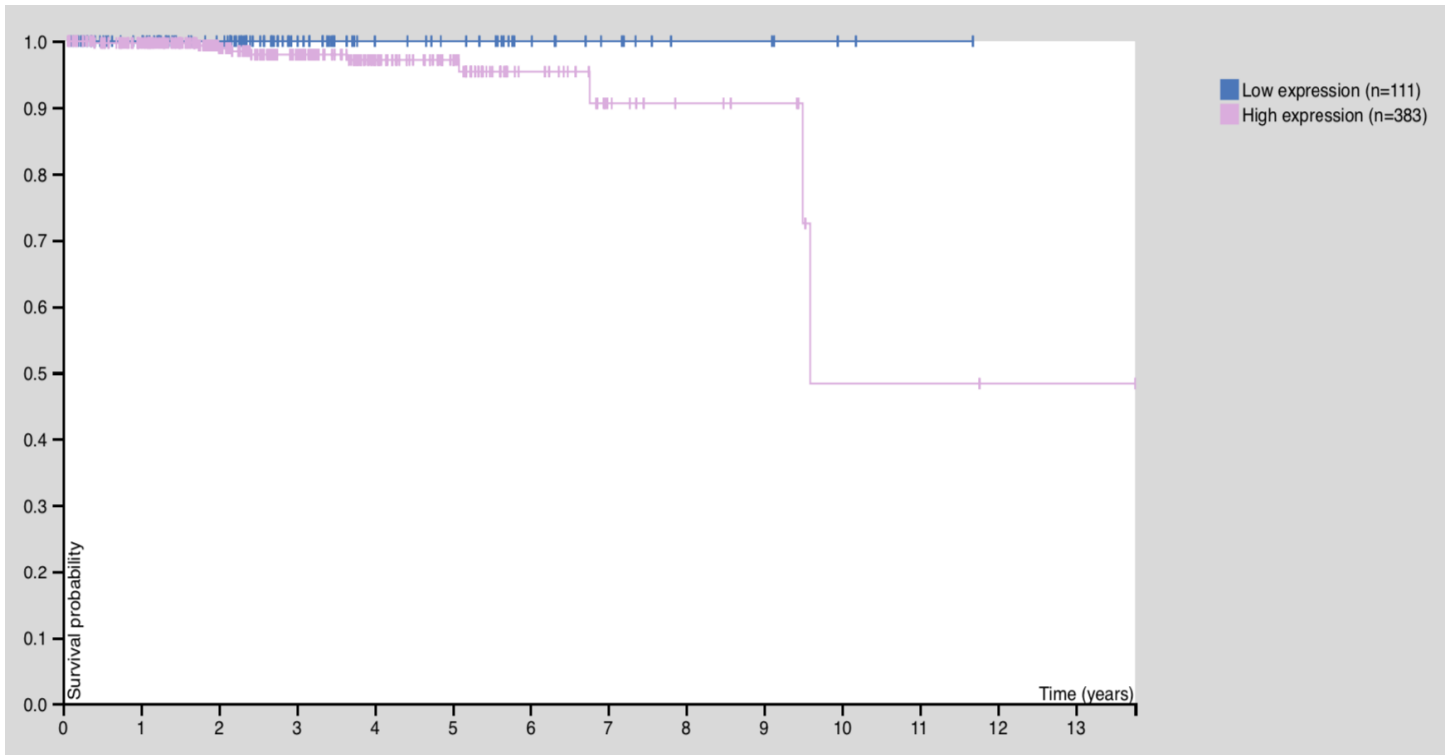

<https://www.proteinatlas.org/ENSG00000138759-FRAS1/pathology/tissue/prostate+cancer#ihc>

Supplemental Figure 3: <https://gtexportal.org/home/snp/rs1910301>

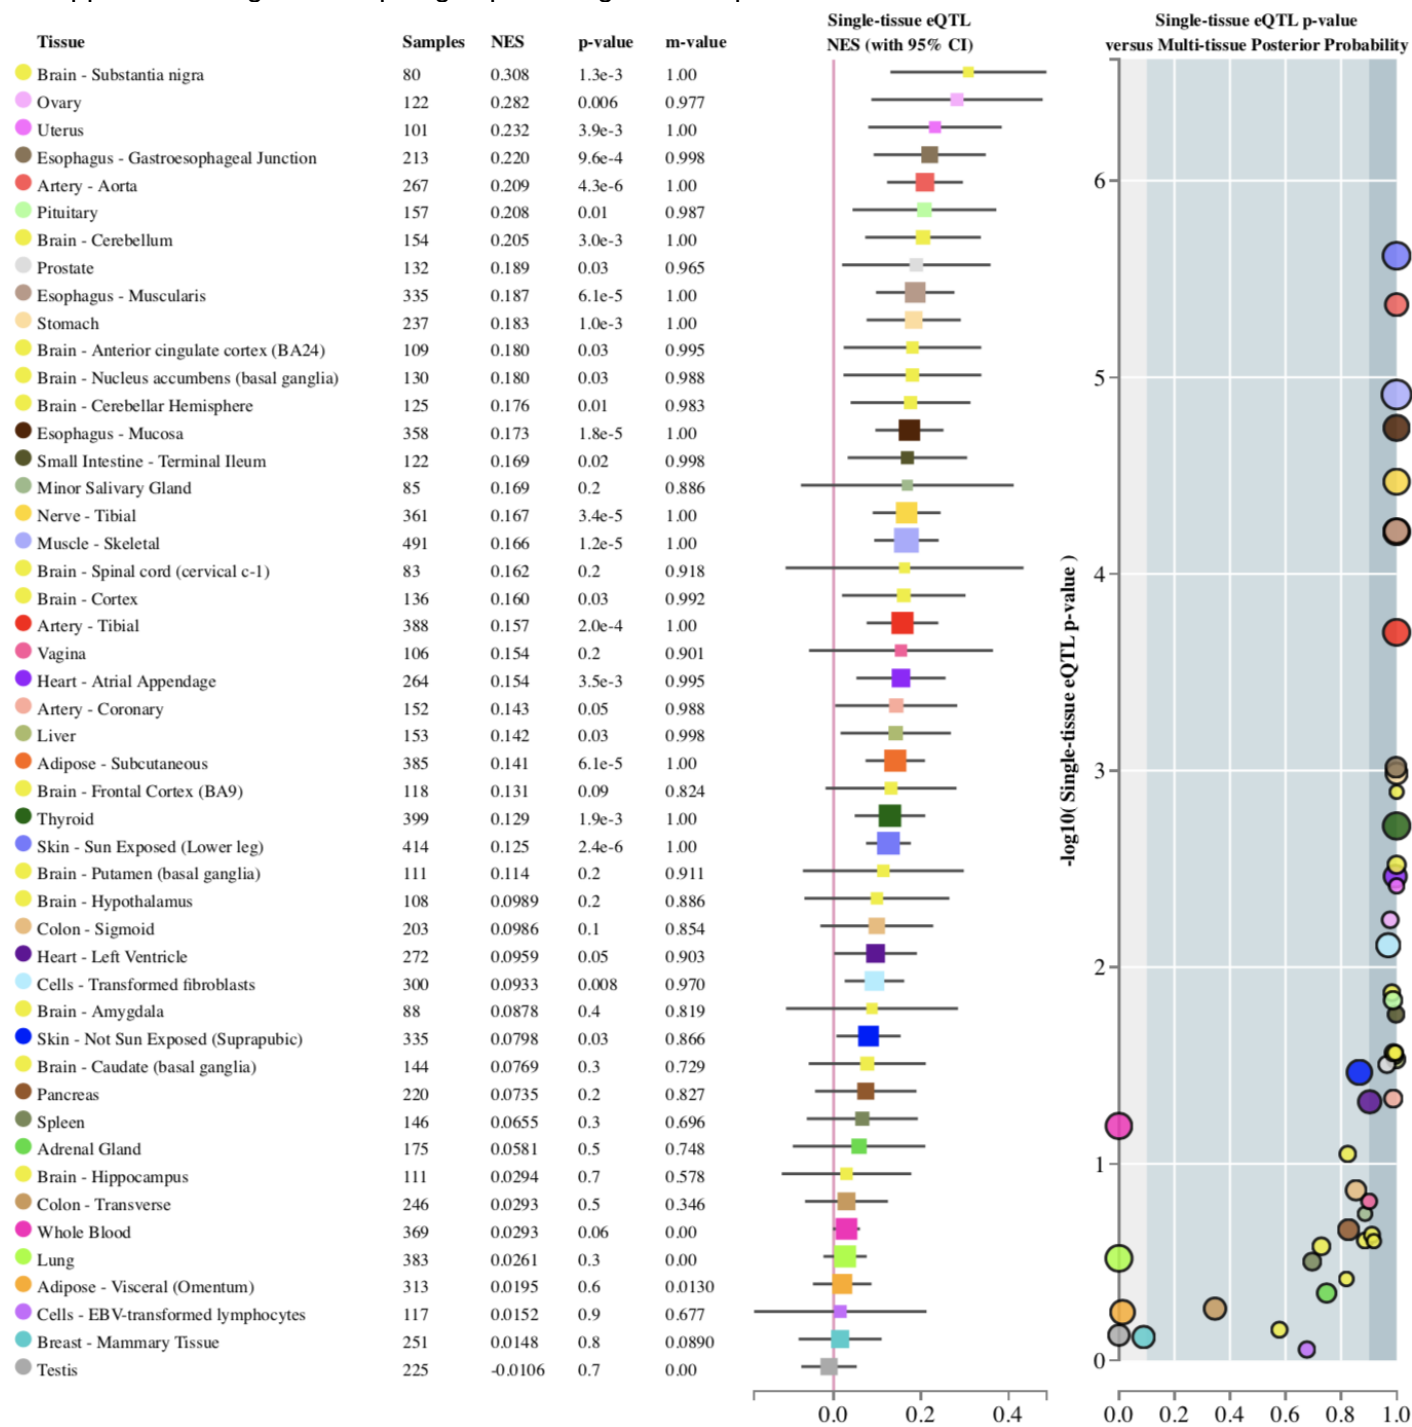

Supplement: NIHMS1739776-supplement-1.pdf [file NIHMS1739776-supplement-1.pdf]
